# Supplementary material for: First evidence of a new simian adenovirus clustering with Human mastadenovirusF viruses
Source: Virol J. 2019 Nov 27;16:147. doi: 10.1186/s12985-019-1248-z (PMC6880561; doi:10.1186/s12985-019-1248-z)
Supplement: Supplementary file 1 — Additional file 1. Excel file with details about the animals sampled for this study. [file 12985_2019_1248_MOESM1_ESM.xls]

## Sheet: Supplement
Country	StateProv	HabitatType	PrimaryInterface	PrimaryInterfaceGroup	AnthropogenicChange	AnthropogenicChangeSecondary	AnimalID (GAINS)	SampleDate	AnimalClassification	SpeciesScientificName	Sex	AgeClass	SpecimenType	TestTypeSpecific	TestRequestedProtocol	ConfirmationResult
Republic of Congo	Sangha	Urban unplanned settlement (slum)	For sale in small market (< 5 vendors)	small market	established village or indigenous settlement	area with hunting	LIB120514	2012-05-27	Wild	Cercopithecus nictitans	Female	Juvenile	Liver	Conventional PCR	Wellehan et al, Pol gene	Negative
Republic of Congo	Sangha	Urban unplanned settlement (slum)	For sale in small market (< 5 vendors)	small market	established village or indigenous settlement	area with hunting	LIB120514	2012-05-27	Wild	Cercopithecus nictitans	Female	Juvenile	Liver	Conventional PCR	Casas, Hexon gene	Negative
Republic of Congo	Sangha	Urban unplanned settlement (slum)	For sale in small market (< 5 vendors)	small market	established village or indigenous settlement	area with hunting	LIB120514	2012-05-27	Wild	Cercopithecus nictitans	Female	Juvenile	Lung	Conventional PCR	Casas, Hexon gene	Negative
Republic of Congo	Sangha	Urban unplanned settlement (slum)	For sale in small market (< 5 vendors)	small market	established village or indigenous settlement	area with hunting	LIB120514	2012-05-27	Wild	Cercopithecus nictitans	Female	Juvenile	Lung	Conventional PCR	Wellehan et al, Pol gene	Negative
Republic of Congo	Sangha	Urban unplanned settlement (slum)	For sale in small market (< 5 vendors)	small market	established village or indigenous settlement	area with hunting	LIB120601	2012-06-01	Wild	Cercopithecus nictitans	Male	Adult	Liver	Conventional PCR	Wellehan et al, Pol gene	Negative
Republic of Congo	Sangha	Urban unplanned settlement (slum)	For sale in small market (< 5 vendors)	small market	established village or indigenous settlement	area with hunting	LIB120601	2012-06-01	Wild	Cercopithecus nictitans	Male	Adult	Liver	Conventional PCR	Casas, Hexon gene	Negative
Republic of Congo	Sangha	Urban unplanned settlement (slum)	For sale in small market (< 5 vendors)	small market	established village or indigenous settlement	area with hunting	LIB120601	2012-06-01	Wild	Cercopithecus nictitans	Male	Adult	Lung	Conventional PCR	Wellehan et al, Pol gene	Negative
Republic of Congo	Sangha	Urban unplanned settlement (slum)	For sale in small market (< 5 vendors)	small market	established village or indigenous settlement	area with hunting	LIB120601	2012-06-01	Wild	Cercopithecus nictitans	Male	Adult	Lung	Conventional PCR	Casas, Hexon gene	Negative
Republic of Congo	Sangha	Urban unplanned settlement (slum)	For sale in small market (< 5 vendors)	small market	established village or indigenous settlement	area with hunting	LIB120610	2012-06-09	Wild	Cercopithecus nictitans	Male	Juvenile	Liver	Conventional PCR	Wellehan et al, Pol gene	Negative
Republic of Congo	Sangha	Urban unplanned settlement (slum)	For sale in small market (< 5 vendors)	small market	established village or indigenous settlement	area with hunting	LIB120610	2012-06-09	Wild	Cercopithecus nictitans	Male	Juvenile	Liver	Conventional PCR	Casas, Hexon gene	Negative
Republic of Congo	Sangha	Urban unplanned settlement (slum)	For sale in small market (< 5 vendors)	small market	established village or indigenous settlement	area with hunting	LIB120610	2012-06-09	Wild	Cercopithecus nictitans	Male	Juvenile	Lung	Conventional PCR	Casas, Hexon gene	Negative
Republic of Congo	Sangha	Urban unplanned settlement (slum)	For sale in small market (< 5 vendors)	small market	established village or indigenous settlement	area with hunting	LIB120610	2012-06-09	Wild	Cercopithecus nictitans	Male	Juvenile	Lung	Conventional PCR	Wellehan et al, Pol gene	Negative
Republic of Congo	Sangha	Urban unplanned settlement (slum)	For sale in small market (< 5 vendors)	small market	established village or indigenous settlement	area with hunting	LIB120619	2012-06-20	Wild	Lophocebus albigena	Male	Adult	Liver	Conventional PCR	Casas, Hexon gene	Negative
Republic of Congo	Sangha	Urban unplanned settlement (slum)	For sale in small market (< 5 vendors)	small market	established village or indigenous settlement	area with hunting	LIB120619	2012-06-20	Wild	Lophocebus albigena	Male	Adult	Liver	Conventional PCR	Wellehan et al, Pol gene	Negative
Republic of Congo	Sangha	Urban unplanned settlement (slum)	For sale in small market (< 5 vendors)	small market	established village or indigenous settlement	area with hunting	LIB120619	2012-06-20	Wild	Lophocebus albigena	Male	Adult	Lung	Conventional PCR	Wellehan et al, Pol gene	Negative
Republic of Congo	Sangha	Urban unplanned settlement (slum)	For sale in small market (< 5 vendors)	small market	established village or indigenous settlement	area with hunting	LIB120619	2012-06-20	Wild	Lophocebus albigena	Male	Adult	Lung	Conventional PCR	Casas, Hexon gene	Negative
Republic of Congo	Sangha	Urban unplanned settlement (slum)	For sale in small market (< 5 vendors)	small market	established village or indigenous settlement	area with hunting	LIB120625	2012-06-21	Wild	Lophocebus albigena	Female	Adult	Liver	Conventional PCR	Wellehan et al, Pol gene	Negative
Republic of Congo	Sangha	Urban unplanned settlement (slum)	For sale in small market (< 5 vendors)	small market	established village or indigenous settlement	area with hunting	LIB120625	2012-06-21	Wild	Lophocebus albigena	Female	Adult	Liver	Conventional PCR	Casas, Hexon gene	Negative
Republic of Congo	Sangha	Urban unplanned settlement (slum)	For sale in small market (< 5 vendors)	small market	established village or indigenous settlement	area with hunting	LIB120625	2012-06-21	Wild	Lophocebus albigena	Female	Adult	Lung	Conventional PCR	Wellehan et al, Pol gene	Negative
Republic of Congo	Sangha	Urban unplanned settlement (slum)	For sale in small market (< 5 vendors)	small market	established village or indigenous settlement	area with hunting	LIB120625	2012-06-21	Wild	Lophocebus albigena	Female	Adult	Lung	Conventional PCR	Casas, Hexon gene	Negative
Republic of Congo	Sangha	Urban unplanned settlement (slum)	For sale in small market (< 5 vendors)	small market	established village or indigenous settlement	area with hunting	LIB120630	2012-06-23	Wild	Cercopithecus cephus	Male	Adult	Liver	Conventional PCR	Casas, Hexon gene	Negative
Republic of Congo	Sangha	Urban unplanned settlement (slum)	For sale in small market (< 5 vendors)	small market	established village or indigenous settlement	area with hunting	LIB120630	2012-06-23	Wild	Cercopithecus cephus	Male	Adult	Liver	Conventional PCR	Wellehan et al, Pol gene	Negative
Republic of Congo	Sangha	Urban unplanned settlement (slum)	For sale in small market (< 5 vendors)	small market	established village or indigenous settlement	area with hunting	LIB120630	2012-06-23	Wild	Cercopithecus cephus	Male	Adult	Lung	Conventional PCR	Wellehan et al, Pol gene	Negative
Republic of Congo	Sangha	Urban unplanned settlement (slum)	For sale in small market (< 5 vendors)	small market	established village or indigenous settlement	area with hunting	LIB120630	2012-06-23	Wild	Cercopithecus cephus	Male	Adult	Lung	Conventional PCR	Casas, Hexon gene	Negative
Republic of Congo	Sangha	Urban unplanned settlement (slum)	For sale in small market (< 5 vendors)	small market	established village or indigenous settlement	area with hunting	LIB120631	2012-06-23	Wild	Cercopithecus cephus	Female	Adult	Liver	Conventional PCR	Wellehan et al, Pol gene	Negative
Republic of Congo	Sangha	Urban unplanned settlement (slum)	For sale in small market (< 5 vendors)	small market	established village or indigenous settlement	area with hunting	LIB120631	2012-06-23	Wild	Cercopithecus cephus	Female	Adult	Liver	Conventional PCR	Casas, Hexon gene	Negative
Republic of Congo	Sangha	Urban unplanned settlement (slum)	For sale in small market (< 5 vendors)	small market	established village or indigenous settlement	area with hunting	LIB120631	2012-06-23	Wild	Cercopithecus cephus	Female	Adult	Lung	Conventional PCR	Casas, Hexon gene	Negative
Republic of Congo	Sangha	Urban unplanned settlement (slum)	For sale in small market (< 5 vendors)	small market	established village or indigenous settlement	area with hunting	LIB120631	2012-06-23	Wild	Cercopithecus cephus	Female	Adult	Lung	Conventional PCR	Wellehan et al, Pol gene	Negative
Republic of Congo	Sangha	Urban unplanned settlement (slum)	Hunted	hunted	established village or indigenous settlement	area with hunting	LIB120635	2012-06-26	Wild	Cercopithecus cephus	Female	Adult	Liver	Conventional PCR	Casas, Hexon gene	Negative
Republic of Congo	Sangha	Urban unplanned settlement (slum)	Hunted	hunted	established village or indigenous settlement	area with hunting	LIB120635	2012-06-26	Wild	Cercopithecus cephus	Female	Adult	Liver	Conventional PCR	Wellehan et al, Pol gene	Negative
Republic of Congo	Sangha	Urban unplanned settlement (slum)	Hunted	hunted	established village or indigenous settlement	area with hunting	LIB120635	2012-06-26	Wild	Cercopithecus cephus	Female	Adult	Lung	Conventional PCR	Wellehan et al, Pol gene	Negative
Republic of Congo	Sangha	Urban unplanned settlement (slum)	Hunted	hunted	established village or indigenous settlement	area with hunting	LIB120635	2012-06-26	Wild	Cercopithecus cephus	Female	Adult	Lung	Conventional PCR	Casas, Hexon gene	Negative
Republic of Congo	Sangha	Urban unplanned settlement (slum)	Hunted	hunted	established village or indigenous settlement	area with hunting	LIB120637	2012-06-28	Wild	Cercopithecus cephus	Male	Juvenile	Liver	Conventional PCR	Wellehan et al, Pol gene	Negative
Republic of Congo	Sangha	Urban unplanned settlement (slum)	Hunted	hunted	established village or indigenous settlement	area with hunting	LIB120637	2012-06-28	Wild	Cercopithecus cephus	Male	Juvenile	Liver	Conventional PCR	Casas, Hexon gene	Negative
Republic of Congo	Sangha	Urban unplanned settlement (slum)	Hunted	hunted	established village or indigenous settlement	area with hunting	LIB120637	2012-06-28	Wild	Cercopithecus cephus	Male	Juvenile	Lung	Conventional PCR	Casas, Hexon gene	Negative
Republic of Congo	Sangha	Urban unplanned settlement (slum)	Hunted	hunted	established village or indigenous settlement	area with hunting	LIB120637	2012-06-28	Wild	Cercopithecus cephus	Male	Juvenile	Lung	Conventional PCR	Wellehan et al, Pol gene	Negative
Republic of Congo	Sangha	Urban unplanned settlement (slum)	Hunted	hunted	established village or indigenous settlement	area with hunting	LIB120638	2012-06-30	Wild	Cercopithecus nictitans	Male	Juvenile	Liver	Conventional PCR	Casas, Hexon gene	Negative
Republic of Congo	Sangha	Urban unplanned settlement (slum)	Hunted	hunted	established village or indigenous settlement	area with hunting	LIB120638	2012-06-30	Wild	Cercopithecus nictitans	Male	Juvenile	Liver	Conventional PCR	Wellehan et al, Pol gene	Negative
Republic of Congo	Sangha	Urban unplanned settlement (slum)	Hunted	hunted	established village or indigenous settlement	area with hunting	LIB120638	2012-06-30	Wild	Cercopithecus nictitans	Male	Juvenile	Lung	Conventional PCR	Casas, Hexon gene	Negative
Republic of Congo	Sangha	Urban unplanned settlement (slum)	Hunted	hunted	established village or indigenous settlement	area with hunting	LIB120638	2012-06-30	Wild	Cercopithecus nictitans	Male	Juvenile	Lung	Conventional PCR	Wellehan et al, Pol gene	Negative
Republic of Congo	Sangha	Urban unplanned settlement (slum)	Hunted	hunted	established village or indigenous settlement	area with hunting	LIB120639	2012-06-30	Wild	Cercopithecus nictitans	Male	Adult	Liver	Conventional PCR	Wellehan et al, Pol gene	Negative
Republic of Congo	Sangha	Urban unplanned settlement (slum)	Hunted	hunted	established village or indigenous settlement	area with hunting	LIB120639	2012-06-30	Wild	Cercopithecus nictitans	Male	Adult	Liver	Conventional PCR	Casas, Hexon gene	Negative
Republic of Congo	Sangha	Urban unplanned settlement (slum)	Hunted	hunted	established village or indigenous settlement	area with hunting	LIB120639	2012-06-30	Wild	Cercopithecus nictitans	Male	Adult	Lung	Conventional PCR	Wellehan et al, Pol gene	Negative
Republic of Congo	Sangha	Urban unplanned settlement (slum)	Hunted	hunted	established village or indigenous settlement	area with hunting	LIB120639	2012-06-30	Wild	Cercopithecus nictitans	Male	Adult	Lung	Conventional PCR	Casas, Hexon gene	Negative
Republic of Congo	Sangha	Urban unplanned settlement (slum)	Hunted	hunted	established village or indigenous settlement	area with hunting	LIB120640	2012-06-30	Wild	Cercopithecus nictitans	Male	Juvenile	Liver	Conventional PCR	Wellehan et al, Pol gene	Negative
Republic of Congo	Sangha	Urban unplanned settlement (slum)	Hunted	hunted	established village or indigenous settlement	area with hunting	LIB120640	2012-06-30	Wild	Cercopithecus nictitans	Male	Juvenile	Liver	Conventional PCR	Casas, Hexon gene	Negative
Republic of Congo	Sangha	Urban unplanned settlement (slum)	Hunted	hunted	established village or indigenous settlement	area with hunting	LIB120640	2012-06-30	Wild	Cercopithecus nictitans	Male	Juvenile	Lung	Conventional PCR	Casas, Hexon gene	Negative
Republic of Congo	Sangha	Urban unplanned settlement (slum)	Hunted	hunted	established village or indigenous settlement	area with hunting	LIB120640	2012-06-30	Wild	Cercopithecus nictitans	Male	Juvenile	Lung	Conventional PCR	Wellehan et al, Pol gene	Negative
Republic of Congo	Sangha	Urban unplanned settlement (slum)	Hunted	hunted	established village or indigenous settlement	area with hunting	LIB120707	2012-07-18	Wild	Cercopithecus cephus	Male	Juvenile	Liver	Conventional PCR	Wellehan et al, Pol gene	Negative
Republic of Congo	Sangha	Urban unplanned settlement (slum)	Hunted	hunted	established village or indigenous settlement	area with hunting	LIB120707	2012-07-18	Wild	Cercopithecus cephus	Male	Juvenile	Liver	Conventional PCR	Casas, Hexon gene	Negative
Republic of Congo	Sangha	Urban unplanned settlement (slum)	Hunted	hunted	established village or indigenous settlement	area with hunting	LIB120707	2012-07-18	Wild	Cercopithecus cephus	Male	Juvenile	Lung	Conventional PCR	Casas, Hexon gene	Negative
Republic of Congo	Sangha	Urban unplanned settlement (slum)	Hunted	hunted	established village or indigenous settlement	area with hunting	LIB120707	2012-07-18	Wild	Cercopithecus cephus	Male	Juvenile	Lung	Conventional PCR	Wellehan et al, Pol gene	Negative
Republic of Congo	Sangha	Urban unplanned settlement (slum)	Hunted	hunted	established village or indigenous settlement	area with hunting	LIB120708	2012-07-19	Wild	Cercopithecus cephus	Male	Adult	Liver	Conventional PCR	Wellehan et al, Pol gene	Positive
Republic of Congo	Sangha	Urban unplanned settlement (slum)	Hunted	hunted	established village or indigenous settlement	area with hunting	LIB120708	2012-07-19	Wild	Cercopithecus cephus	Male	Adult	Liver	Conventional PCR	Casas, Hexon gene	Negative
Republic of Congo	Sangha	Urban unplanned settlement (slum)	Hunted	hunted	established village or indigenous settlement	area with hunting	LIB120708	2012-07-19	Wild	Cercopithecus cephus	Male	Adult	Lung	Conventional PCR	Wellehan et al, Pol gene	Negative
Republic of Congo	Sangha	Urban unplanned settlement (slum)	Hunted	hunted	established village or indigenous settlement	area with hunting	LIB120708	2012-07-19	Wild	Cercopithecus cephus	Male	Adult	Lung	Conventional PCR	Casas, Hexon gene	Negative
Republic of Congo	Sangha	Urban unplanned settlement (slum)	Hunted	hunted	established village or indigenous settlement	area with hunting	LIB120714	2012-07-22	Wild	Cercopithecus cephus	Female	Adult	Liver	Conventional PCR	Wellehan et al, Pol gene	Negative
Republic of Congo	Sangha	Urban unplanned settlement (slum)	Hunted	hunted	established village or indigenous settlement	area with hunting	LIB120714	2012-07-22	Wild	Cercopithecus cephus	Female	Adult	Liver	Conventional PCR	Casas, Hexon gene	Negative
Republic of Congo	Sangha	Urban unplanned settlement (slum)	Hunted	hunted	established village or indigenous settlement	area with hunting	LIB120714	2012-07-22	Wild	Cercopithecus cephus	Female	Adult	Lung	Conventional PCR	Wellehan et al, Pol gene	Negative
Republic of Congo	Sangha	Urban unplanned settlement (slum)	Hunted	hunted	established village or indigenous settlement	area with hunting	LIB120714	2012-07-22	Wild	Cercopithecus cephus	Female	Adult	Lung	Conventional PCR	Casas, Hexon gene	Negative
Republic of Congo	Sangha	Urban unplanned settlement (slum)	Hunted	hunted	established village or indigenous settlement	area with hunting	LIB120801	2012-08-01	Wild	Cercopithecus pogonias	Male	Adult	Liver	Conventional PCR	Casas, Hexon gene	Negative
Republic of Congo	Sangha	Urban unplanned settlement (slum)	Hunted	hunted	established village or indigenous settlement	area with hunting	LIB120801	2012-08-01	Wild	Cercopithecus pogonias	Male	Adult	Liver	Conventional PCR	Wellehan et al, Pol gene	Negative
Republic of Congo	Sangha	Urban unplanned settlement (slum)	Hunted	hunted	established village or indigenous settlement	area with hunting	LIB120801	2012-08-01	Wild	Cercopithecus pogonias	Male	Adult	Lung	Conventional PCR	Wellehan et al, Pol gene	Negative
Republic of Congo	Sangha	Urban unplanned settlement (slum)	Hunted	hunted	established village or indigenous settlement	area with hunting	LIB120801	2012-08-01	Wild	Cercopithecus pogonias	Male	Adult	Lung	Conventional PCR	Casas, Hexon gene	Negative
Republic of Congo	Sangha	Urban unplanned settlement (slum)	Hunted	hunted	established village or indigenous settlement	area with hunting	LIB120803	2012-08-03	Wild	Cercopithecus cephus	Female	Juvenile	Liver	Conventional PCR	Wellehan et al, Pol gene	Negative
Republic of Congo	Sangha	Urban unplanned settlement (slum)	Hunted	hunted	established village or indigenous settlement	area with hunting	LIB120803	2012-08-03	Wild	Cercopithecus cephus	Female	Juvenile	Liver	Conventional PCR	Casas, Hexon gene	Negative
Republic of Congo	Sangha	Urban unplanned settlement (slum)	Hunted	hunted	established village or indigenous settlement	area with hunting	LIB120803	2012-08-03	Wild	Cercopithecus cephus	Female	Juvenile	Lung	Conventional PCR	Wellehan et al, Pol gene	Negative
Republic of Congo	Sangha	Urban unplanned settlement (slum)	Hunted	hunted	established village or indigenous settlement	area with hunting	LIB120803	2012-08-03	Wild	Cercopithecus cephus	Female	Juvenile	Lung	Conventional PCR	Casas, Hexon gene	Negative
Republic of Congo	Sangha	Urban unplanned settlement (slum)	Hunted	hunted	established village or indigenous settlement	area with hunting	LIB120804	2012-08-04	Wild	Lophocebus albigena	Male	Adult	Liver	Conventional PCR	Wellehan et al, Pol gene	Negative
Republic of Congo	Sangha	Urban unplanned settlement (slum)	Hunted	hunted	established village or indigenous settlement	area with hunting	LIB120804	2012-08-04	Wild	Lophocebus albigena	Male	Adult	Liver	Conventional PCR	Casas, Hexon gene	Negative
Republic of Congo	Sangha	Urban unplanned settlement (slum)	Hunted	hunted	established village or indigenous settlement	area with hunting	LIB120804	2012-08-04	Wild	Lophocebus albigena	Male	Adult	Lung	Conventional PCR	Wellehan et al, Pol gene	Negative
Republic of Congo	Sangha	Urban unplanned settlement (slum)	Hunted	hunted	established village or indigenous settlement	area with hunting	LIB120804	2012-08-04	Wild	Lophocebus albigena	Male	Adult	Lung	Conventional PCR	Casas, Hexon gene	Negative
Republic of Congo	Sangha	Urban unplanned settlement (slum)	Hunted	hunted	established village or indigenous settlement	area with hunting	LIB120805	2012-08-05	Wild	Cercopithecus nictitans	Male	Adult	Liver	Conventional PCR	Casas, Hexon gene	Negative
Republic of Congo	Sangha	Urban unplanned settlement (slum)	Hunted	hunted	established village or indigenous settlement	area with hunting	LIB120805	2012-08-05	Wild	Cercopithecus nictitans	Male	Adult	Liver	Conventional PCR	Wellehan et al, Pol gene	Negative
Republic of Congo	Sangha	Urban unplanned settlement (slum)	Hunted	hunted	established village or indigenous settlement	area with hunting	LIB120805	2012-08-05	Wild	Cercopithecus nictitans	Male	Adult	Lung	Conventional PCR	Wellehan et al, Pol gene	Negative
Republic of Congo	Sangha	Urban unplanned settlement (slum)	Hunted	hunted	established village or indigenous settlement	area with hunting	LIB120805	2012-08-05	Wild	Cercopithecus nictitans	Male	Adult	Lung	Conventional PCR	Casas, Hexon gene	Negative
Republic of Congo	Sangha	lowland forest	Hunted	hunted	established village or indigenous settlement	area with hunting	LIB120807	2012-08-09	Wild	Cercopithecus nictitans	Male	Adult	Liver	Conventional PCR	Wellehan et al, Pol gene	Negative
Republic of Congo	Sangha	lowland forest	Hunted	hunted	established village or indigenous settlement	area with hunting	LIB120807	2012-08-09	Wild	Cercopithecus nictitans	Male	Adult	Liver	Conventional PCR	Casas, Hexon gene	Negative
Republic of Congo	Sangha	lowland forest	Hunted	hunted	established village or indigenous settlement	area with hunting	LIB120807	2012-08-09	Wild	Cercopithecus nictitans	Male	Adult	Lung	Conventional PCR	Casas, Hexon gene	Negative
Republic of Congo	Sangha	lowland forest	Hunted	hunted	established village or indigenous settlement	area with hunting	LIB120807	2012-08-09	Wild	Cercopithecus nictitans	Male	Adult	Lung	Conventional PCR	Wellehan et al, Pol gene	Negative
Republic of Congo	Sangha	lowland forest	Hunted	hunted	established village or indigenous settlement	area with hunting	LIB120808	2012-08-11	Wild	Cercopithecus neglectus	Male	Adult	Liver	Conventional PCR	Casas, Hexon gene	Negative
Republic of Congo	Sangha	lowland forest	Hunted	hunted	established village or indigenous settlement	area with hunting	LIB120808	2012-08-11	Wild	Cercopithecus neglectus	Male	Adult	Liver	Conventional PCR	Wellehan et al, Pol gene	Negative
Republic of Congo	Sangha	lowland forest	Hunted	hunted	established village or indigenous settlement	area with hunting	LIB120808	2012-08-11	Wild	Cercopithecus neglectus	Male	Adult	Lung	Conventional PCR	Wellehan et al, Pol gene	Negative
Republic of Congo	Sangha	lowland forest	Hunted	hunted	established village or indigenous settlement	area with hunting	LIB120808	2012-08-11	Wild	Cercopithecus neglectus	Male	Adult	Lung	Conventional PCR	Casas, Hexon gene	Negative
Republic of Congo	Sangha	lowland forest	Hunted	hunted	established village or indigenous settlement	area with hunting	LIB120812	2012-08-14	Wild	Cercopithecus nictitans	Male	Adult	Liver	Conventional PCR	Wellehan et al, Pol gene	Negative
Republic of Congo	Sangha	lowland forest	Hunted	hunted	established village or indigenous settlement	area with hunting	LIB120812	2012-08-14	Wild	Cercopithecus nictitans	Male	Adult	Liver	Conventional PCR	Casas, Hexon gene	Negative
Republic of Congo	Sangha	lowland forest	Hunted	hunted	established village or indigenous settlement	area with hunting	LIB120812	2012-08-14	Wild	Cercopithecus nictitans	Male	Adult	Lung	Conventional PCR	Wellehan et al, Pol gene	Negative
Republic of Congo	Sangha	lowland forest	Hunted	hunted	established village or indigenous settlement	area with hunting	LIB120812	2012-08-14	Wild	Cercopithecus nictitans	Male	Adult	Lung	Conventional PCR	Casas, Hexon gene	Negative
Republic of Congo	Sangha	lowland forest	Hunted	hunted	established village or indigenous settlement	area with hunting	LIB120816	2012-08-14	Wild	Cercopithecus nictitans	Male	Adult	Liver	Conventional PCR	Wellehan et al, Pol gene	Negative
Republic of Congo	Sangha	lowland forest	Hunted	hunted	established village or indigenous settlement	area with hunting	LIB120816	2012-08-14	Wild	Cercopithecus nictitans	Male	Adult	Liver	Conventional PCR	Casas, Hexon gene	Negative
Republic of Congo	Sangha	lowland forest	Hunted	hunted	established village or indigenous settlement	area with hunting	LIB120816	2012-08-14	Wild	Cercopithecus nictitans	Male	Adult	Lung	Conventional PCR	Wellehan et al, Pol gene	Negative
Republic of Congo	Sangha	lowland forest	Hunted	hunted	established village or indigenous settlement	area with hunting	LIB120816	2012-08-14	Wild	Cercopithecus nictitans	Male	Adult	Lung	Conventional PCR	Casas, Hexon gene	Negative
Republic of Congo	Sangha	Urban unplanned settlement (slum)	Hunted	hunted	established village or indigenous settlement	area with hunting	LIB120832	2012-08-24	Wild	Cercopithecus cephus	Female	Juvenile	Lung	Conventional PCR	Wellehan et al, Pol gene	Negative
Republic of Congo	Sangha	Urban unplanned settlement (slum)	Hunted	hunted	established village or indigenous settlement	area with hunting	LIB120832	2012-08-24	Wild	Cercopithecus cephus	Female	Juvenile	Lung	Conventional PCR	Casas, Hexon gene	Negative
Republic of Congo	Sangha	Urban unplanned settlement (slum)	Hunted	hunted	established village or indigenous settlement	area with hunting	LIB120832	2012-08-24	Wild	Cercopithecus cephus	Female	Juvenile	Liver	Conventional PCR	Casas, Hexon gene	Negative
Republic of Congo	Sangha	Urban unplanned settlement (slum)	Hunted	hunted	established village or indigenous settlement	area with hunting	LIB120832	2012-08-24	Wild	Cercopithecus cephus	Female	Juvenile	Liver	Conventional PCR	Wellehan et al, Pol gene	Negative
